# Supplementary material
Source: MDPI journal article supplement (https://www.mdpi.com/2073-4344/11/8/931)
Supplement: s1 [file s1]

## Cascading Old Yellow Enzyme, Alcohol Dehydrogenase and Glucose Dehydrogenase for Selective Reduction of (*E/Z*)-Citral to (*S*)-Citronellol

Yunpeng Jia <sup>1,†</sup>, Qizhou Wang <sup>1,†</sup>, Jingjing Qiao <sup>1</sup>, Binbin Feng <sup>1</sup>, Xueting Zhou <sup>1</sup>, Lijun Jin <sup>1</sup>, Yingting Feng <sup>1</sup>, Duxia Yang <sup>1</sup>, Chenze Lu <sup>2,\*</sup> and Xiangxian Ying <sup>1,\*</sup>

<sup>1</sup> Key Laboratory of Bioorganic Synthesis of Zhejiang Province, College of Biotechnology and Bioengineering, Zhejiang University of Technology, Hangzhou 310014, China; ddbbjpp123@163.com (Y.J.); W2936716405@163.com (Q.W.); zjut2111905036@163.com (J.Q.); fengbinbin1997@163.com (B.F.); sadie598851321@163.com (X.Z.); jinlijun130@163.com (L.J.); fengyingting2021@163.com (Y.F.); Y1936279940@163.com (D.Y.)

<sup>2</sup> College of Life Sciences, China Jiliang University, Hangzhou 310018, China

\* Correspondence: chenze.lu@cjl.u.edu.cn (C.L.); yingxx@zjut.edu.cn (X.Y.); Tel.: +86-571-88320781 (X.Y.)

† These authors contributed equally to this work.

### Contents

|                                                                                                                                          |    |
|------------------------------------------------------------------------------------------------------------------------------------------|----|
| .....                                                                                                                                    | 1  |
| Supplementary tables.....                                                                                                                | 2  |
| Table S1. The primers for the construction of the plasmid pACYCDuet-1-YsADH.....                                                         | 2  |
| Table S2. The primers for the construction of the plasmid pACYCDuet-1-YsADH-NemR-PS.....                                                 | 3  |
| Supplementary figures.....                                                                                                               | 4  |
| Figure S1. The codon-optimized nucleotide sequences encoding old yellow enzymes, alcohol dehydrogenase and glucose dehydrogenase. ....   | 9  |
| Figure S2. The effect of agitation speed on enzymatic double reduction of ( <i>E/Z</i> )-citral to ( <i>S</i> )-citronellol. ....        | 10 |
| Figure S3. Schematic formation and consumption of the intermediate ( <i>S</i> )-citronellal and the by-products nerol and geraniol. .... | 11 |
| Figure S4. GC chromatogram for various standards used in the study and the product extracted from the reaction mixture. ....             | 13 |
| Figure S5. GC-MS analyses of substrate, intermediate and product. ....                                                                   | 14 |
| Figure S6. The <sup>1</sup> H NMR (a) and <sup>13</sup> C NMR (b) analyses of the product ( <i>S</i> )-citronellol. ....                 | 15 |
| Figure S7. The setup of the reactor with constant pH auto-titration system. ....                                                         | 16 |

Supplementary tables

**Table S1.** The primers for the construction of the plasmid pACYCDuet-1-*YsADH*

| Primer                  | Sequence                                                                           |
|-------------------------|------------------------------------------------------------------------------------|
| pET28b- <i>YsADH</i> -F | 5'-TAATAAGGAGATATACCATGGGCATGTCTATTATAAAAAGCTATGCCGC-3'                            |
| pET28b- <i>YsADH</i> -R | 5'-TAAGCATTATGCGGCCGCAAGCTTAAAGTCGGCTTGCAGTACCACG-3'                               |
| pACYCDuet-1-F           | 5'-<br>CGGCATAGCTTTTTATAATAGACATGCCCATGGTATATCTCCTTATTAAAGTTAA<br>ACAAAATTATTTC-3' |
| pACYCDuet-1-R           | 5'-TGGTACTGCAAGCCGACTTTAAGCTTGCGGCCGCATAATGCTTAAG-3'                               |

**Table S2.** The primers for the construction of the plasmid pACYCDuet-1-*YsADH-NemR-PS*

| Primer                      | Sequence                                                                   |
|-----------------------------|----------------------------------------------------------------------------|
| pET28b- <i>NemR-PS-F</i>    | 5'-<br>GTATAAGAAGGAGATATACATATGATGAGCCAGAAAAAGCTGTTTACG<br>C-3'            |
| pET28b- <i>NemR-PS-R</i>    | 5'-CGGTTTCTTTACCAGACTCGAGCAGGCTCGGATAATCGGTATAACC-3'                       |
| pACYCDuet-1- <i>YsADH-F</i> | 5'-<br>CTTTTCTGGCTCATCATATGTATATCTCCTTCTTATACTTAACTAATATA<br>CTAAGATGGG-3' |
| pACYCDuet-1- <i>YsADH-R</i> | 5'-GATTATCCGAGCCTGCTCGAGTCTGGTAAAGAAACCGCTGCTGC-3'                         |

## Supplementary figures

>OYE3

ATGCCGTTTGTAAAGGGTTTGAACCGATTAGCCTGCGTGACACCAACCTGTTCTGAACCGATTAA  
AATTGGGAACACCCAGCTGGCCACCGTGCCGTTATGCCGCCGCTGACCCGCATGCGTGCAACC  
CACCCGGTAATATTCCGAATAAAGAATGGGCAGCAGTTTATTATGGTCAGCGCGCACAGCGTCC  
GGTACTATGATTATTACAGAGGGCACATTTATTTACCCGCAGGCAGGAGGCTATGATAATGCGC  
CGGTATCTGGTCAGATGAACAGGTGGCAGAGTGGAACAAACATCTTTCTGGCAATTCACGACTG  
TCAGAGCTTTGCATGGGTCCAGCTGTGGAGTCTGGGTTGGGCGAGTTTCCGGATGTTCTGGCGC  
GTGATGGGCTGCGTTATGATTGTGCAAGCGATCGTGTTTATATGAATGCAACGCTGCAGGAGAAA  
GCGAAAGATGCAAATAATCTGGAGCATAGCCTGACCAAAGATGATATTAAACAGTATATCAAAG  
ACTACATCCACGCAGCAAAAAATAGCATTGCAGCAGGTGCAGATGGTGTGAAATTCATAGCGC  
AAATGGTTATCTGCTGAATCAGTTTCTGGATCCGCATAGCAATAAACGTACCGATGAATATGGTG  
GTACCATTGAAAATCGTGCACGTTTTACCCTGGAAGTTGTTGATGCACTGATTGAAACCATTGGT  
CCGGAACGTGTTGGTCTGCGTCTGAGCCCGTATGGTACCTTAATAGCATGAGCGGTGGTGCAGA  
ACCGGTATTATTGCACAGTATAGCTATGTTCTGGGTGAACTGGAAAAACGTGCAAAAGCAGGT  
AAACGTCTGGCATTGTTTCATCTGGTTGAACCGCGTGTTACCGATCCGAGCCTGGTTGAAGGTGA  
AGGTGAATATAGCGAAGGTACCAATGATTTTGCATATAGCATTGGAAAGGTCCGATTATTCGTGC  
AGGTAATTATGCACTGCATCCGGAAGTTGTTCTGTAACAGGTTAAAGATCCGCGTACCCTGATTG  
GTTATGGTCGTTTTTTTATTAGCAATCCGGATCTGGTTTATCGTCTGGAAGAAGGTCTGCCGCTGA  
ATAAATATGATCGTAGCACCTTTTATACCATGAGCGCAGAAGGTTATACCGATTATCCGACCTATG  
AAGAAGCAGTTGATCTGGGTTGGAATAAAAATTAA

>OYE2p

ATGCCATTTGTAAAGGACTTTAAGCCACAAGCTTTGGGTGACACCAACTTATTCAAACCAATCAA  
AATTGGTAACAATGAACTTCTGCACCGTGCTGTCATTCTCCATTGACTAGAATGAGAGCCCAAC  
ATCCAGGTAATATCCAAACAGAGACTGGGCCGTTGAATACTACGCTCAACGTGCTCAAAGACC  
AGGAACCTTGATTATCACTGAGGGTACCTTTCCCTCTCCACAATCTGGGGGTTACGACAATGCTC  
CAGGTATCTGGTCCGAAGAACAATTAAGAATGGACCAAGATTTTCAAGGCTATTCATGAGAA  
GAAATCGTTGCGATGGGTCCAATTATGGGTTCTAGGTTGGGCTGCTTTCCAGACACCCTTGCTA  
GGGATGTTTTGCGTTACGACTCCGCTTCTGACAACGTGTATATGAATGCAGAACAAGAAGAAAA  
GGCTAAGAAGGCTAACAACCCACAACACAGTATAACAAAGGATGAAATTAAGCAATACGTCAA  
AGAATACGTCCAAGCTGCCAAAACTCCATTGCTGCTGGTGCCGATGGTGTTGAAATCCACAGC  
GCTAACGGTACTTGTTGAACCAGTTCTTGGAACCCACACTCCAATAACAGAACCGATGAGTATGG  
TGGATCCATCGAAAACAGAGCCCGTTTACCTTGGAAGTGGTTGATGCAGTTGTGCGATGCTATTG  
GTCCTGAAAAAGTCGTTTTGAGATTGTCTCCATATGGTGTCTTCAACAGTATGTCTGGTGGTGCTG  
AAACCGGTATTGTTGCTCAATATGCTTATGTCTTAGGTGAACTAGAAAGAAGAGCTAAAGCTGGC  
AAGCGTTTGGCTTTTCGTCCATCTAATCGAACCTCGTGTCACCAACCCATTTTTAACTGAAGGTGA  
AGGTGAATACAATGGAGGTAGCAACGAATTTGCTTATTCTATCTGGAAGGGCCCAATTATTAGAG  
CTGGTAACCTTTGCTCTGCACCCAGAAGTTGTGAGAGAAGAGGTGAAGGATCCTAGAACATTGAT  
CGGTTACGGTAGATTTTTTATCTCTAATCCAGATTTGGTTGATCGTTTGGAAAAAGGGTTACCATT  
AAACAAATATGACAGAGACACTTTCTACAAAATGTCAGCTGAGGGATACATTGACTACCCTACG  
TACGAAGAAGCTCTAAAACTCGGTTGGGACAAAAATTAA

>OYE2y

ATGCCATTTGTTAAGGACTTTAAGCCACAAGCTTTGAGTGACACCAACTTATTCAAACCAATCAA  
AATTGGTAACAATGAACTTCTGCACCGTGCTGTCATTCTCCATTGACTAGAATGAGAGCCCAAC  
ATCCAGGTAATATTCCAAACAGAGACTGGGCCGTTGAATACTACTCTCAACGTGCTCAAAGACC  
AGGAACCTTGATTATCACTGAGGGTACCTTTCCCTCTCCACAATCTGGGGGTTACGACAATGCTC  
CAGGTATCTGGTCCGAAGAACAATTAAGAATGGACCAAGATTTTCAAGGCTATTCATGAGAA  
GAAATCGTTCGCATGGGTCCAATTATGGGTTCTAGGTTGGGCTGCTTTCCAGACACCCTTGCTA  
GGGATGGTTTGCGTTACGACTCCGCTTCTGACAACGTGTATATGAATGCAGAACAAGAAGAAAA  
GGCTAAGAAGGCTAACAACCCACAACACAGTATAACAAAGGATGAAATTAAGCAATACGTCAA  
AGAATACGTCCAAGCTGCCAAAACTCCATTGCTGCTGGTGCCGATGGTGTTGAAATCCACAGC  
GCTAACGGTACTTGTTGAACCAGTTCTTGGACCCACACTCCAATAACAGAACCGATGAGTATGG  
TGGATCCATCGAAAACAGAGCCCGTTTCACCTTGGAAGTGGTTGATGCAGTTGTGCGATGCTATTG  
GTCCTGAAAAAGTCGGTTTGAGATTGTCTCCATATGGTGTCTTCAACAGTATGTCTGGTGGTGCTG  
AAACCGGTATTGTTGCTCAATATGCTTATGTCTTAGGTGAACTAGAAAGAAGAGCTAAAGCTGGC  
AAGCGTTTGGCTTTCGTCCATCTAGTTGAACCTCGTGTACCAACCCATTTTAACTGAAGGTGA  
AGGTGAATACAATGGAGGTAGCAACGAATTTGCTTATTCTATCTGGAAGGGCCCAATTATTAGAG  
CTGGTAACTTTGCTCTGCGCCCAAGTTGTCAGAGAAGAGGTGAAGGATCCTAGAACATTGAT  
CGGTTACGGTAGATTTTTTATCTCTAATCCAGATTTGGTTGATCGTTTGGAAAAAGGGTTACCATT  
AAACAAATATGACAGAGACACTTTCTACAAAATGTCAGCTGAGGGATACATTGACTACCCTACG  
TACGAAGAAGCTCTAAAACCTCGGTTGGGACAAAAATTA

>OYE2y-HG

ATGCCATTTGTTAAGGACTTTAAGCCACAAGCTTTGAGTGACACCAACTTATTCAAACCAATCAA  
AATTGGTAACAATGAACTTCTGCACCGTGCTGTCATTCTCCATTGACTAGAATGAGAGCCCAAC  
ATCCAGGTAATATTCCAAACAGAGACTGGGCCGTTGAATACTACTCTCAACGTGCTCAAAGACC  
AGGAACCTTGATTATCACTGAGGGTACCTTTGGCTCTCCACAATCTGGGGGTTACGACAATGCTC  
CAGGTATCTGGTCCGAAGAACAATTAAGAATGGACCAAGATTTTCAAGGCTATTCATGAGAA  
GAAATCGTTCGCATGGGTCCAATTATGGGTTCTAGGTTGGGCTGCTTTCCAGACACCCTTGCTA  
GGGATGGTTTGCGTTACGACTCCGCTTCTGACAACGTGTATATGAATGCAGAACAAGAAGAAAA  
GGCTAAGAAGGCTAACAACCCACAACACAGTATAACAAAGGATGAAATTAAGCAATACGTCAA  
AGAATACGTCCAAGCTGCCAAAACTCCATTGCTGCTGGTGCCGATGGTGTTGAAATCCACAGC  
GCTAACGGTACTTGTTGAACCAGTTCTTGGACCCACACTCCAATAACAGAACCGATGAGTATGG  
TGGATCCATCGAAAACAGAGCCCGTTTCACCTTGGAAGTGGTTGATGCAGTTGTGCGATGCTATTG  
GTCCTGAAAAAGTCGGTTTGAGATTGTCTCCATATGGTGTCTTCAACAGTATGTCTGGTGGTGCTG  
AAACCGGTATTGTTGCTCAATATGCTTATGTCTTAGGTGAACTAGAAAGAAGAGCTAAAGCTGGC  
AAGCGTTTGGCTTTCGTCCATCTAGTTGAACCTCGTGTACCAACCCATTTTAACTGAAGGTGA  
AGGTGAATACAATGGAGGTAGCAACGAATTTGCTTATTCTATCTGGAAGGGCCCAATTATTAGAG  
CTGGTAACTTTGCTCTGCACCCAGAAGTTGTCAGAGAAGAGGTGAAGGATCCTAGAACATTGAT  
CGGTTACGGTAGATTTTTTATCTCTAATCCAGATTTGGTTGATCGTTTGGAAAAAGGGTTACCATT  
AAACAAATATGACAGAGACACTTTCTACAAAATGTCAGCTGAGGGATACATTGACTACCCTACG  
TACGAAGAAGCTCTAAAACCTCGGTTGGGACAAAAATTA

>NemR-SG

ATGAGCAGCGAAAACTGTATAGCCCGCTGAAAGTGGGTGCGATTACCGCGGCAAACCGTATTT  
TTATGGCGCCGCTGACCCGCCTGCGTAGCATTGAACCGGGCGATATTCCGACGCCGCTGATGGCA  
GAATATTATCGTCAGCGTGCAAGTGCGGGTCTGATTATTAGTGAAGCAACACAGATTAGTGCCCA  
GGCAAAAGGTTATGCAGGTGCACCAGGTATTCATTACCAGAACAGATTGCAGCATGGAAAAA  
GATTACCGCAGGTGTTTCATGCAGAAAATGGTCATATGGCAGTTCAGCTGTGGCATAACAGGTCGTA  
TTAGTCATGCAAGCCTGCAGCCGGGTGGTCAGGCACCGGTAGCACCGAGCGCACTGAGCGCAG  
GTACCCGTACAAGCCTGCGTGATGAAAATGGTCAGGCAATCCGTGTTGAAACCAGCATGCCGCG  
TGCACTGGAAGTGAAGAAATTCGGGGCATTGTAAATGATTTTCGTCAGGCAATTGCAAATGCA  
CGTGAAGCTGGTTTTGATCTGGTTGAACTGCATAGTGCACATGGTTATCTGCTGCATCAGTTTCTG  
AGCCCTTCATCTAATCATCGTACCGATCAGTATGGTGGTAGCGTTGAAAATCGTGCACGTCTGGT  
GCTGGAAGTTGTGGATGCAGGTATTGAAGAATGGGGTGCCGATCGTATTGGTATTCGTGTTTCCC  
CGATTGGTACATTCAGAATACGGATAATGGTCCGAACGAAGAAGCAGATGCGCTGTATCTGATT  
GAACAGCTGGGTAAACGTGGTATTGCATATCTGCATATGAGTGAACCGGATTGGGCAGGTGGCG  
AACCGTATACAGATGCATTTTCGTGAAAAAGTGGTGCACGTTTTTCATGGTCCGATTATTGGTGCA  
GGTGCATATACCGTTGAAAAAGCAGAAACCCCTGATTGGTAAAGGTCTGATTGATGCCGTTGCATT  
TGGTCGTGATTGGATCGGAATCCGGATCTGGTTGCGCGCCTGCAGCGTCGTGCGGAAGTGAATC  
CGCAGCGCGCAGAAAGCTTTTATGGTGGTGGTGCCGAAGGTTATACCGATTATCCGACCCTGTAA

>NemR-CK

ATGAGCAGCGAAAACTGTTTACCCCGCTGAAAGTTGGTGCGATTACCGCGGCGAACCCTGTGT  
TTATGGCGCCGCTGACCGGCCTGCGTAGCATTGAACCGGGTGATATTCCGACGCCGCTGATGGCA  
GAATATTATCGTCAGCGTGCAAGTGCGGGTCTGATTATTAGTGAAGCTACCCAGATCAGTGCCCA  
GGCAAAAGGTTATGCAGGTGCACCTGGTCTGCATAGTGTGAAACAGATTGAAGCATGGAAAAAG  
ATTACCGCAGGTGTTTCATGCAGAACAGGGCCATATTGCAGTTCAGCTGTGGCATAACAGGTCGTAT  
TAGTCATTCAAGTCTGCAGCCGGGCAGTCAGCCGCCGGTTAGCGCATCAGCAATTGGCGCAGGT  
ACCCGTACAAGCCTGCGTGATGAAAATGGTCAGGCAATTCGTGTTGATACCAGCATGCCTCGTG  
CACTGGAAACCGATGAAATTCCAGGTATTGTTAATGATTTTCGCCAGGCAATTGCAAATGCACGT  
GAAGCTGGTTTTGATCTGGTTGAACTGCATAGTGCACATGGTTATCTGCTGCATCAGTTTCTGAGT  
CCGACGAGCAATCATCGTACCGATCAGTATGGTGGTAGCGTTGAAAATCGTGCACGTCTGGTGCT  
GGAAGTTGTTGATGCGGGTATTCAGGAATGGGGTGCCGATCGTATTGGTATTCGCGTTAGCCCGA  
TTGGTACATTTTCAAGTGTGATAATGGTCCGAATGAAGAAGCAGATGCACTGTATCTGATTGAA  
GAACTGGGTAAACGTGGTATTGCATATCTGCATATGAGCGAACCAGGATTGGGCAGGTGGTGAAC  
CGTATACGGATGCATTTTCGTGAAAAAGTGGTGCACGTTTTTCATGGTCCGATTATTGGTGCAGGT  
GCATATACCCCGGAAAAAGCAGAAAGATCTGCTGAATAAAGGTCTGATTGATGCCGTGGCATTG  
GTCGTGCATATATTGCGAATCCGGATCTGGTTGCACGTCTGCAGCGTAAAGCGGAAGTGAACCCG  
CAGCGTGCAGAAAGCTTTTATGGCGGTGGTGCCGAAGGTTATACAGATTATCCGACCCTGTAA

>NemR-CR

ATGAGCAGCGAAAACTGTTTACCCCGCTGAAAGTTGGTGCGATTACCGCGCCGAACCCTATTT  
TTATGGCGCCGCTGACCCGCCTGCGTAGCATTGAACCGGGCGATATTCCGACGCCGCTGATGGCA  
GAATATTATCGTCAGCGTGCAAGTGCGGGTCTGATTATTTCTGAAGCAACACAGATTAGTGCCCA  
GGCAAAAGGTTATGCAGGTGCACCAGGTCTGCATAGTGAAGAACAGATCGCAGCATGGAAAAA  
GATTACCGATGGTGTTCATGCAGAAAACGGCCATATTGCAGTTCAGCTGTGGCATAACAGGTCGTA

TCAGCCATGCAAGCCTGCAGCCTGGTGGTCAGAGCCCGGTAAGCGCGAGCGCAATTAGCGCAG  
GTACCCGTACCAGCCTGCGTGATGAAAATGGTAATGCAATTCGTGTTGAAACCAGCATGCCGCG  
TGCACTGAAAACCGAAGAAATCCGGGTATTGTTAATGATTTTCGTACAGCAATTGCCAATGCCC  
GTGAAGCAGGTTTTGATATGGTGGAACTGCATAGTGCAGCATGGTTATCTGCTGCATCAGTTTCTGA  
GCCCTAGCTCAAATCATCGTACCGATTGTTATGGCGGTTCAAGTTGAAAATCGCGCACGTCTGGTT  
CTGGAAGTTGTGGATGCAGGTATTAAAGAATGGGGTGCTGATCGTATTGGTATTCGTGTTAGCCC  
GGTTGGTACGTTTCAGAATGTTGATAATGGTCCGAATGAAGAAGCAGATGCACTGTATCTGATTG  
AAGAAGTGGCGAAACGTGGTATTGCATATCTGCATATGAGCGAACCAGATTGGGCAGGTGGCAC  
GCCATATACCGAAGCATTTTCGTGAAAAAGTGCGTGCGCGTTTTCCGGGTAGCATTATTGGTGCGG  
GCGCATATACCCGTGAAAAAGCAGAAGCACTGATCGAAAAAGGTCTGATTGATGCAGTGGCATT  
TGGTCGCGATTATATCGCGAATCCGGATCTGGTCGCACGTCTGCAGCGTAAAGCAGAACTGAATC  
CGCAGCGTAGTGAAAGCTTTTATGGTGGTGGTGCTGAAGGTTATACCGATTATCCGACCCTGTAA

>NemR-CT

ATGAACCGTGCCCTGCAGAACGTCAGCGTTTTTTTATTAGCCTGGTGACCCGTCGTCCGGTGTA  
CAGTGGTGTACCATGCAGGACGAAAACTGTTTACCCCGCTGAAAGTTGGTGCCATCACAGCA  
CCTAATCGTGTTTTATGGCACCGCTGACCCGCTCTGCGCAGTATTGAACCTGGCGATATTCTACC  
GCCATGATGGCAGAATATTATCGCCAACGTGCAAGTGCAAGTCTGATTATTTAGAGGCTACCCA  
GATTAGTGCCAGGCCAAAGGTTATGCAGGTGCACCTGGTCTGCATTCCGATGAACAGATCGCA  
GCATGGAAAAAGATTACCGCAGCAGTTCATGAAGCCGACGGTCGTATTGCAGTTCAGCTGTGGC  
ATACCGGGCGTATTAGTCATAGTAGTATTACGCCGGGTGGAGAAGCACCGGTGGCACCTAGTGC  
AATTAATGCAGGTACCCGCACCAGCCTGCGTGATGAAAATGGGAAAGCAATCCGTGTTGATACC  
ACCACCCCGCGTGCACTGGAAACACATGAAATTCCGGGTATTGTTGATGATTTTCGTAAAGCAGT  
GGGCAATGCACGTGACGCAGGATTTGATATGGCAGAACTGCACAGCGCACACGGATATCTGCTG  
CATCAATTTCTGAGCCCTAGCTCAAATAAACGTACCGATCAGTATGGCGGAAGTGTAAGAAATC  
GTGCACGTCTGGTTCTGGAAGTAGTTGATGCAGTTAGTAAAGAGTGGAGCGCAGACCGTATTGG  
TATTCGTGTTTCCCGATCGGTAGCTTTCAGAATGTTGATAATGGGCCGAACGAAGAAGCAGATG  
CACTGTATCTGATTGAAGAACTGAATAAACGTGGGATTGCATATCTGCACATGAGCGAACCAGGAT  
TGGGCCGGTGGTGTTCCTTATACCGATGAATTCGTCAAAAAGTTCGTGAACGTTTTGACGGTGC  
AATTATTGGTGCAGGCGCATATTCACGTGAAAAAGCAGAGGCGCTGATTCAGAAAGGTCTGATT  
GATGCAGTCGATTTGGACGTGATTATATCGCAAATCCGGATCTGGTGGAAAGTCTGCGCAAAAA  
GGCAGAACTGAATCCTCAGCGCCCAGAAAGCTTTTACGGTGGTGGTGCCGAGGGTTATATTGATT  
ATCCAACCCTGTAA

>NemR-CS

ATGAGCAGCGAAAACTGTTTAGCCCGCTGAAAGTTGGTGCGATTACCGCGGCGAACCCTATTT  
TTATGGCGCCGCTGACGCGCCTGCGTAGCATTGAACCGGGTGATATTCCGACCCCGCTGATGGCA  
GAATATTATCGTCAGCGTGCAAGTGCGGGTCTGATTATTAGTGAAGCCACCCAGATCAGTGCCCA  
GGCAAAAGGTTATGCAGGTGCACCTGGTCTGCATAGCGAAGCACAGATCGCAGCATGGAAAAA  
GATTACAGCAGCAGTTCATGCAGAACAGGGTCATATTGCAGTTCAGCTGTGGCATAACAGGTCTGTA  
TTAGTCATGCAAGTCTGCAGCCGAATGGTCAGGCACCGGTGGCACCGAGCGCAATTTACAGCAGG  
TACCCGTACAAGCCTGCGTGATGAAAATGGTCAGGCCACGCGCGTTGATACCAGCATGCCGCGT  
GCGCTGGAAACCGAAGAAATCCGGGTATTGTTAATGATTTTCGTACAGGCAATTGCAATGCACG  
TGAAGCAGGTTTTGATATGGTTGAACTGCATAGCGCACATGGTTATCTGCTGCATCAGTTTCTGAG

CCCGACCAGCAATCAGCGTACCGATCAGTATGGCGGTAGCGTTGAAAATCGTGACGTCTGGTT  
CTGGAAGTTGTTGATGCAGGTATTAAAGAATGGGGTGCTGATCGTATTGGTATTCGTGTTAGCCCC  
ATTGGTAGCTTTCAGAATGTTGATAATGGTCCGAATGAAGAAGCAGATGCACTGTATCTGATTGA  
ACAGCTGGGTAAACGTGGTATTGCATATCTGCATATGAGTGAACCGGATTGGGCGGGTGGTGAA  
CCGTATAGTGATGCATTTCTGTGAAAAAGTGCGTGCGCGTTTTTCATTCTCCGATTATTGGTGCAGGC  
GCATATACGCCGAAAAAGCCGAAAGCCTGATTGAAAAAGGTCTGATTGATGCCGTGGCATTG  
GTCGTGCTTATATCGCAATCCGGATCTGGTTGCACGCCTGCAGCGTAAAGCAGAACTGAATCCT  
CAGCGTGCAGAAAGCTTTTATGGTGGTGGTGCTGAAGGTTATACCGATTATCCGACCCTGTAA

>NemR-PS

ATGAGCCAGAAAAAGCTGTTTACGCCGCTGAAAGTTGGTACCCTGACCGCACCGAATCGTATTT  
TTATGGCGCCGCTGACCCGCCTGCGTAGCATTGAACCGGGCGATATTCCGACGCCGCTGATGGGC  
GAATATTATCGCCAGCGTGCCACCGCAGGCCTGATTATTAGCGAAGCAACCCAGATTAGTGCAC  
AGTCAAAAGGTTATGCAGGTGCACCAGGTCTGCATAGCGCAGAACAGATTGCAGCATGGAAAA  
AGATTACCTCAACCGTTCATGAAGCAGGTGGTCTGATTGCAGTACAGCTGTGGCATAACGGGTCGT  
ATTAGTCATGTTAGCCTGCAGCCGAACGGTCTGGCACCGGTTGCACCGTCAGCAATTTACGCCG  
GCACACGTACCAGTCTGCGTGATGAAAATGGTCTGCCATTCTGTGTAGATACCAGCATGCCGCGT  
GCACTGGAAACCGAAGAAATTCCGGCAATTGTTAATGATTTTCGCCAGGCAGTTGCAAATGCCC  
GTGAAGCTGGTTTTGATATGGCTGAACTGCATGCAGCACATGGTTATCTGCTGCATCAGTTTCTGA  
GCCCCGTAGCAAATCATCGTACCGATCAGTATGGCGGTACCCGTGAAAATCGTGACGTTTTCTG  
CTGGATGTTGTTGATGCAGTTTGTGCAGAAATGGGGTAGCGAACATATTGGTATTCGTATTAGTCCG  
ATTGGTACCTTTCAGAATACAGATAATGGTCCTAATGAAGTTGATGATGCTCTGTATCTGATTGAA  
GAACTGGATAAACGTCATATTGCATATCTGCATCTGAGCGAACCGGATTGGGCAGGTGGTCAGCC  
ATATACCGATGATTTTCGTCAGAAAGTTCGTGAACGTTTTTCATGGTGTATTATTGGTGCAGGCGC  
ATATACGACAGAAAAAGCAGAAAATCTGATTGAAAAAGGTCTGATTGATGCAGTTGCCTTTGGT  
CGTGATTTTATTGCGAATCCGGATCTGGTTGTGCGTCTGAAAAATAAAGCAGCACTGAACCCACA  
CGTCCGGAAAGCTTTTATGGTGGTGGTGCCGAAGGTTATACCGATTATCCGAGCCTGTAA

>YsADH

ATGTCTATTATAAAAAGCTATGCCGCAAAAGAGGCGGGCAGCGAACTCGAACTTTACGAATATG  
ATGCCGGTGAACCTCAGGCCGGAAGATGTCGAGGTGCAGGTGCACTACTGCGGTATCTGCCATTC  
CGATCTTTCCATGATCGACAACGAATGGGGATTCTCTCAGTATCCGCTGGTTGCCGGGCATGAAG  
TGATTGGCCGCGTGCGCGGCTCGGCAGTGCGGCGCAGGAAAAAGGGGTGAAAGTTGGTCAGC  
GCGTGGGCGTAGGCTGGACGGCGCGCAGCTGTGGGCATTGCGATGCATGTATCAGCGGTAATCA  
GATTAACCTGCCTGGAAGGCGCCGTAGCCACCATTCTCAACCGTGGCGGTTTTGCCGAGAACTG  
CGGGCAGACTGGCAGTGGGTGATCCCGCTTCCGGAGAGCATCGATATTGAGTCGGCAGGTCTC  
TGTTATGCGGCGGTATTACGGTTTTTAAACCTCTGCTGATGCACCACATCACCGCGACCAGTCGC  
GTGGGGGTGATCGGCATCGGCGGTCTTGGGCACATTGCCATTAACTGTTGCACGCAATGGGCT  
GTGAAGTGACCGCATTACAGCTCGAATCCGTCGAAAGAACAGGAAGTGCTGGCAATGGGGGCGG  
ATAAAGTCGTGAACAGTCGCGATCCAGACGCGTTAAATGCGCTGGCAGGCCAGTTTGATCTCATT  
ATCAACACCGTTAATGTCGACCTCGACTGGCAGCCCTACTTTGAAGCGCTGGCCTATGGCGGCC  
ATTTCCACACCGTCGGCGCAGTGATGAAGCCGCTGCCGGTTCCGGCGTTTACATTGATTGCTGGC  
GATCGCAGCATCTCCGGCTCAGCAACCGGTACGCCCTATGAGCTGCGCAAATTGATGAAGTTTG  
CCGGGCGCAGCAAGGTCTCGCCGACGACAGAGCTGTTCCCAATGTCGCAAATCAACGAAGCCA



TCCAGCACGTTTCGCGACGGCAAAGCGCGTTACCGCGTGGTACTGCAAGCCGACTTTTGAAAGCT  
TGCGGCCGCACTCGAGCACCACCACCACCACCACTGA

>BmGDH<sub>M6</sub>

ATGTATAAAGATCTGGAAGGTAAAGTGGTGGTGATTACAGGTAGCAGCACGGGTCTGGGTAAAA  
GCATGGCAATTCGTTTTGCGACGGAAAAAGCGAAAGTTGTTGTGAATTATCGTAGCAAAGAAGA  
TGAAGCAAATAGCGTGCTGGAAGAAATTAATAAAGGTGGGTGGTGAAGCAATCGCAGTTAAAGG  
TGATGTTACAGTGGAAAGCGATATTATTAATCTGGTTCAGAGCGCAATCAAAGAATTTGGTAAAC  
TGGATGTTATGATCAACAATGCAGGTCTGGAAAATCCGGTTCGAGTCATGAAATGAGCCTGAG  
CGATTGGAATAAAGTGATCGATACCAATCTGACCGGCGCATTTCTGGGTAGCCGTGAAGCAATTA  
AATATTTTGTGAAAACGATATCCGTGGTACCGTTATTAATATGTCATCTGTTTCATGAAAAAATTCC  
GTGGCCGCTGTTTGTTCATTATGCAGCAAGCAAAGGTGGTATGCGTCTGATGACCAAAACCCTGG  
CACTGGAATATGCACCGAAAGGTATTTCGTGTTAATAATATTGGTCCGGGTGCAATTAATACCCCG  
ATTAATGCAGAAAAATTTGCAGATCCGGAACAGCGTGCAGATGTTGAAAGCATGATTCCGATGG  
GTTATATTGGTGAACCGGAAGAAATTGCAGCAGTTGCAGCATGGCTGGCAAGCAGCGAAGCAA  
GCTATGTTACCGGTATTACCCTGTTTGCAGATGGTGGTATGACCCTGTATCCGAGCTTTCAGGCAG  
GTCGTGGTTAA

**Figure S1.** The codon-optimized nucleotide sequences encoding old yellow enzymes, alcohol dehydrogenase and glucose dehydrogenase.

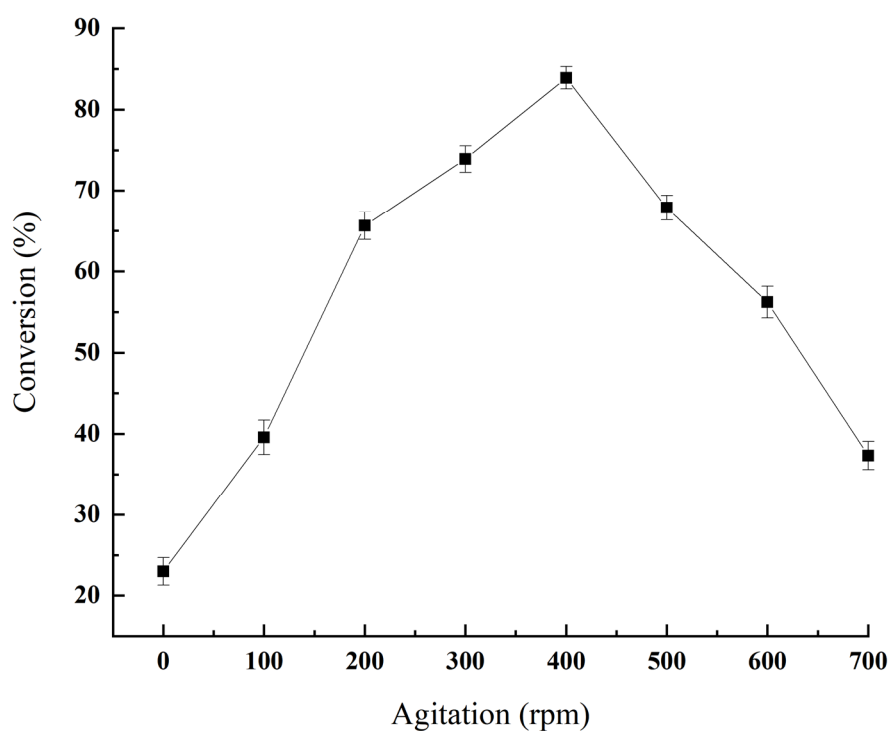

**Figure S2.** The effect of agitation speed on enzymatic double reduction of (*E/Z*)-citral to (*S*)-citronellol. The reaction mixture (10 ml) contained 200 mM (*E/Z*)-citral, 600 mM glucose, 1 g wet cells, 0.2 mM NADP<sup>+</sup>, 20%(v/v) isopropanol and 50 mM PIPES buffer (pH 6.5). The reactions were conducted at 30 °C and 0-700 rpm for 12 h. Standard deviations are indicated in the diagram (n=3).

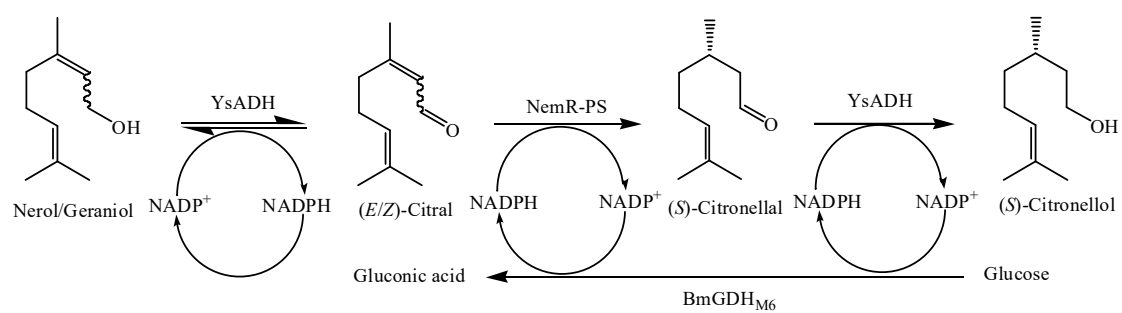

**Figure S3.** Schematic formation and consumption of the intermediate (S)-citronellal and the by-products nerol and geraniol.

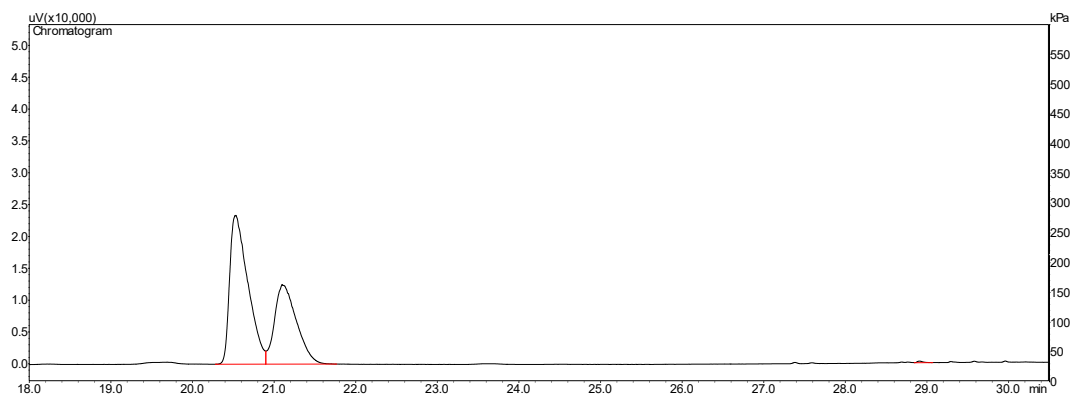

(a)

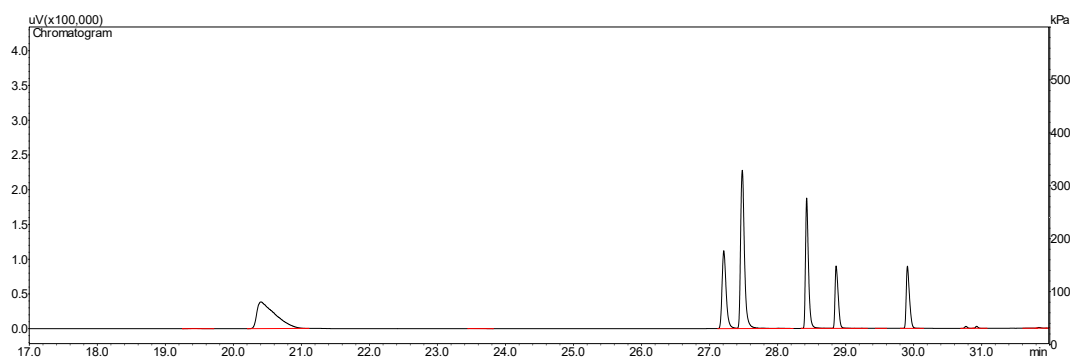

(b)

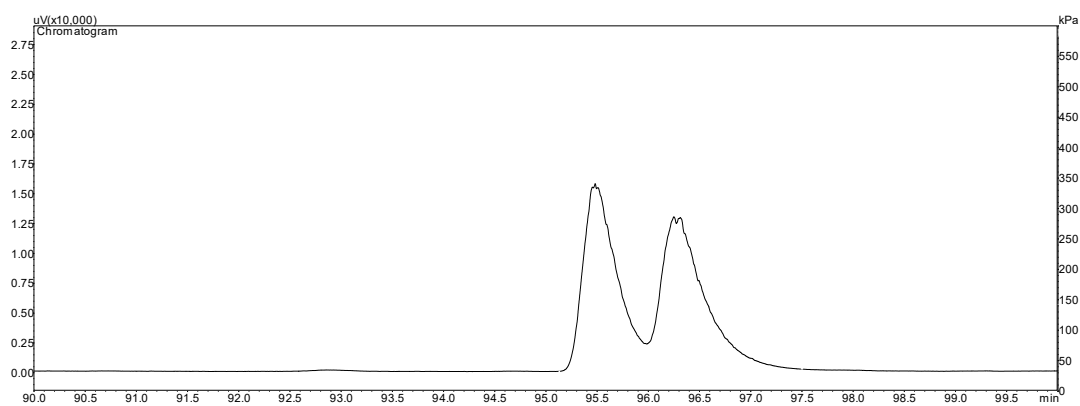

(c)

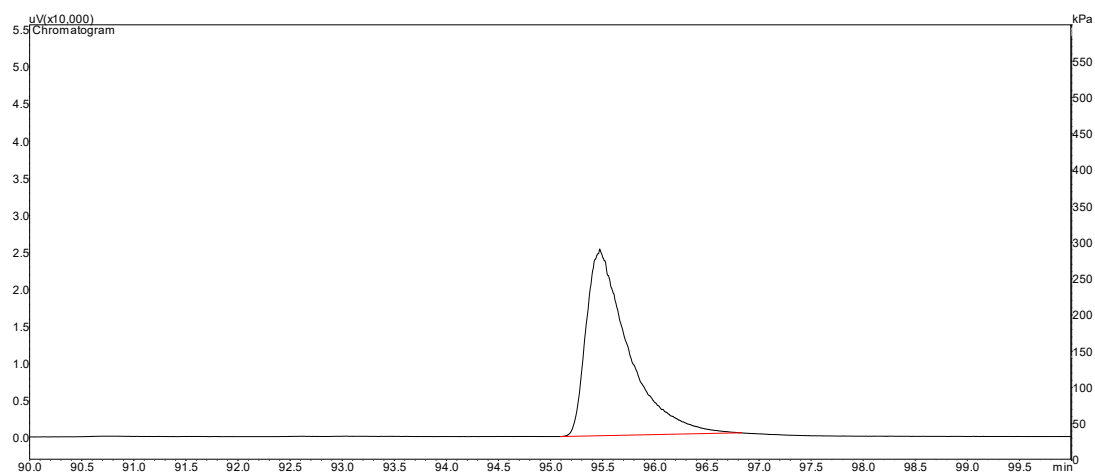

(d)

**Figure S4.** GC chromatogram for various standards used in the study and the product extracted from the reaction mixture. (a), GC chromatogram for (*S*)-citronellal (20.128 min) and (*R*)-citronellal (21.098 min). (b), GC chromatogram for (*S*)-citronellal (20.128 min), nerol (27.208 min), citronellol (27.480 min), geraniol (28.419 min), (*E*)-citral (28.842), (*Z*)-citral (29.890 min). (c) GC chromatogram for (*S*)-citronellol (95.481 min) and (*R*)-citronellol (96.249 min). (d) GC chromatogram for the product (95.481 min) extracted from the reaction mixture.

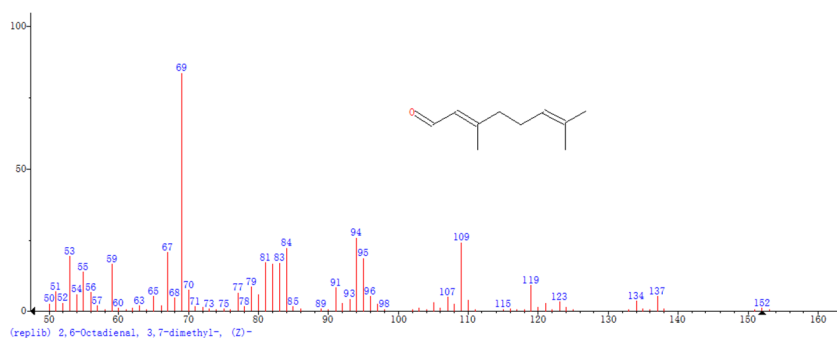

(a)

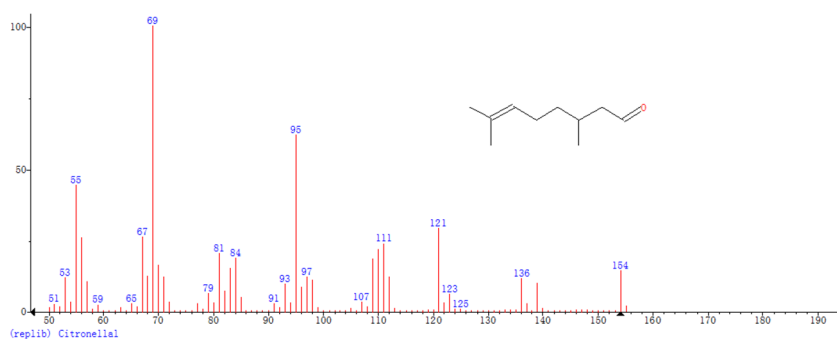

(b)

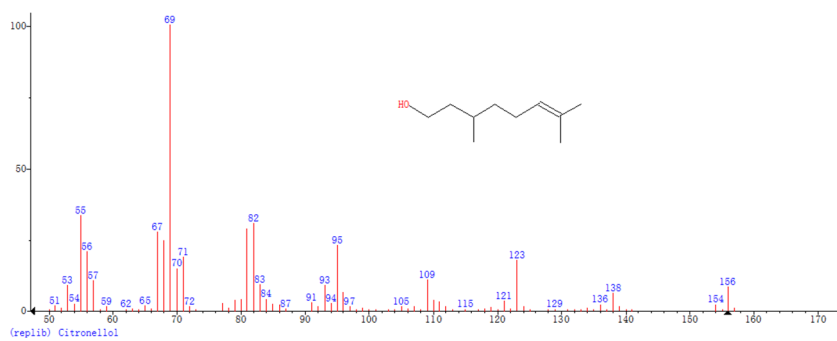

(c)

**Figure S5.** GC-MS analyses of substrate, intermediate and product. (a), GC-MS chromatogram for citral (MW 152). (b), GC-MS chromatogram for citronellal (MW 154). (c), GC-MS chromatogram for citronellol (MW 156).

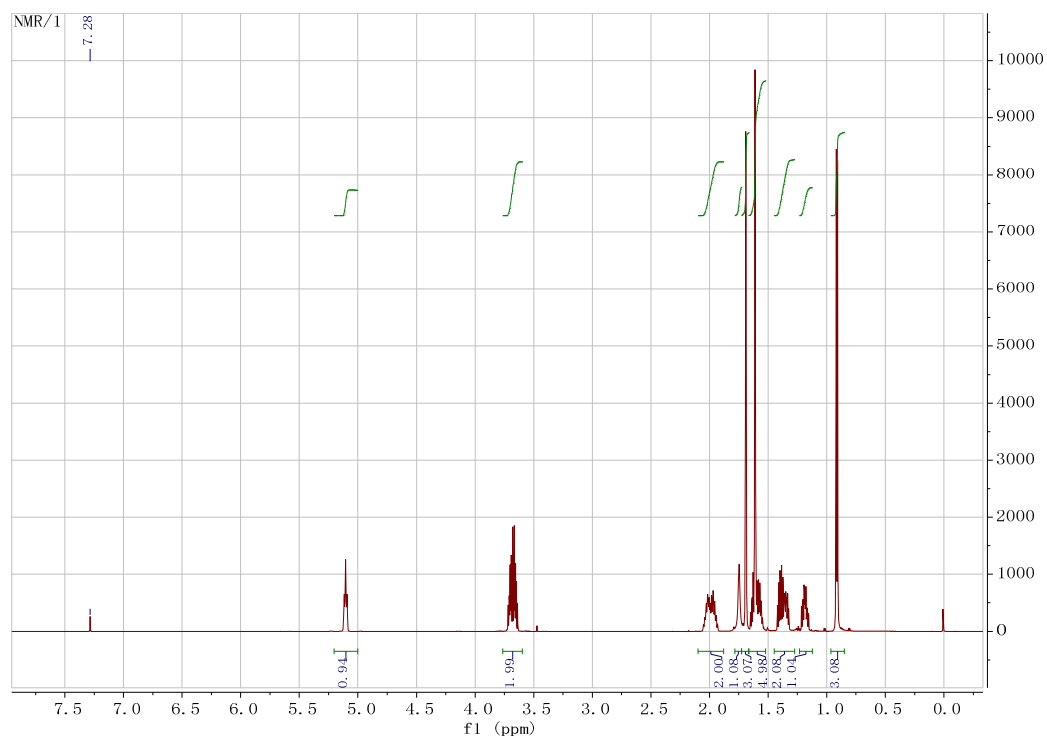

(a)

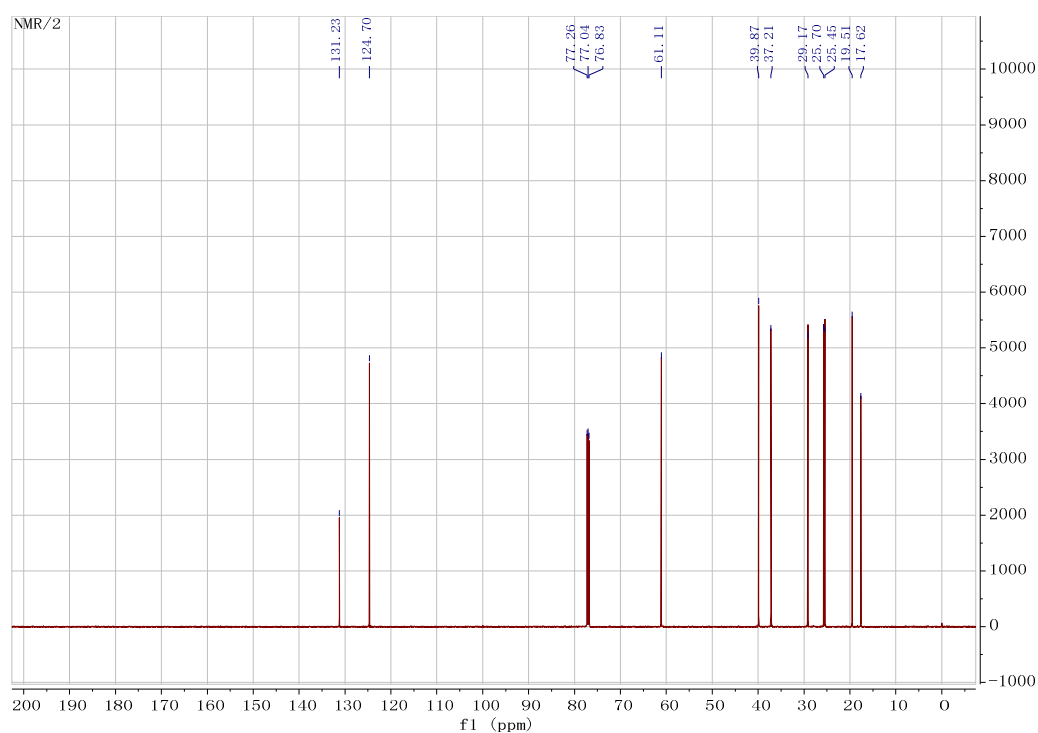

(b)

**Figure S6.** The  $^1\text{H}$  NMR (a) and  $^{13}\text{C}$  NMR (b) analyses of the product (*S*)-citronellol. (a),  $^1\text{H}$  NMR (600 MHz, Chloroform- $d$ )  $\delta$  5.08 (dddd,  $J$  = 8.6, 5.8, 2.7, 1.3 Hz, 1H), 3.71 – 3.60 (m, 2H), 1.99 – 1.90 (m, 2H), 1.66 (d,  $J$  = 1.6 Hz, 3H), 1.62 – 1.58 (m, 3H), 1.58 – 1.52 (m, 2H), 1.40 – 1.29 (m, 2H), 1.16 (dddd,  $J$  = 13.4, 9.5, 7.7, 5.8 Hz, 1H), 0.89 (d,  $J$  = 6.6 Hz, 3H). (b),  $^{13}\text{C}$  NMR (151 MHz,  $\text{CDCl}_3$ )  $\delta$  131.23, 124.70, 61.11, 39.87, 37.21, 29.17, 25.70, 25.45, 19.51, 17.62.

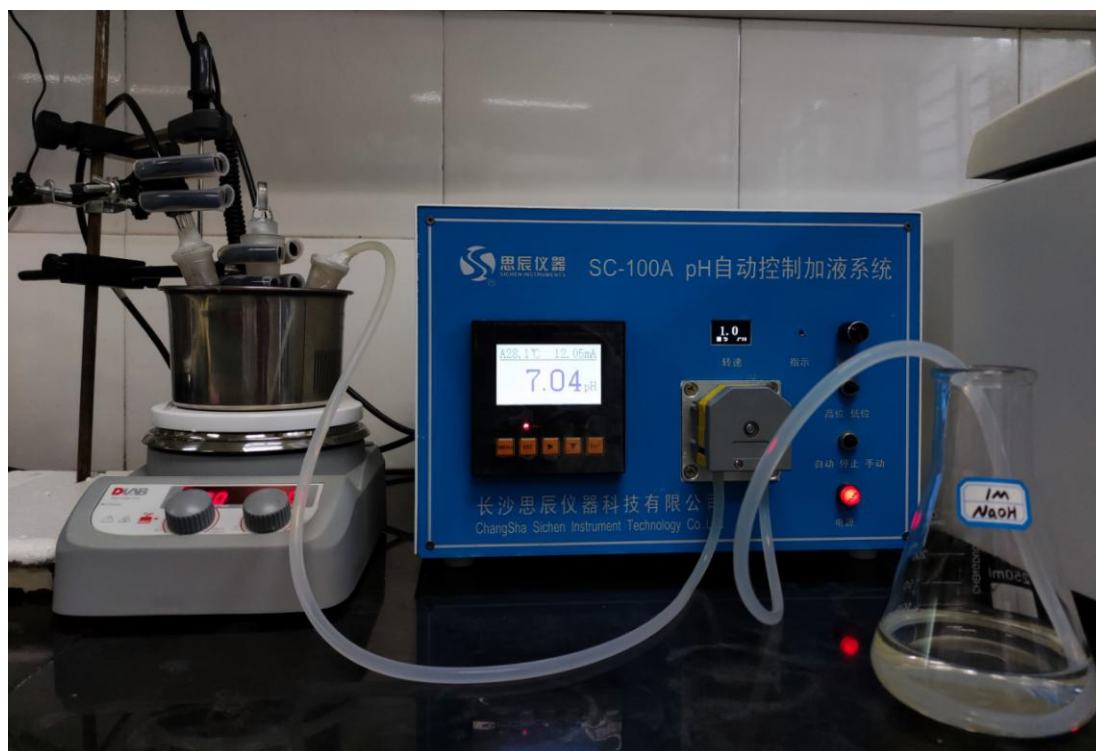

**Figure S7.** The setup of the reactor with constant pH auto-titration system.
